# Supplementary material
Source: PubMed Central journal article supplement (PMC3978204)
Supplement: NIHMS57406-supplement-Supplement1.pdf [file NIHMS57406-supplement-Supplement1.pdf]

## Supplementary Appendix

This appendix has been provided by the authors to give readers additional information about their work.

Supplement to: Day JN, Chau TTH, Wolbers M, et al. Combination antifungal therapy for cryptococcal meningitis. *N Engl J Med* 2013;368:1291-302. DOI: 10.1056/NEJMoa1110404

## SUPPLEMENTARY APPENDIX

### **Combination antifungal therapy reduces mortality in cryptococcal meningitis.**

Jeremy N. Day, Tran T.H. Chau, Marcel Wolbers, Pham P. Mai, Nguyen T. Dung, Nguyen H. Mai, Nguyen H. Phu, Ho D. Nghia, Nguyen D. Phong, Cao Q. Thai, Le H. Thai, Ly V. Chuong, Dinh X. Sinh, Van A. Duong, Thu N. Hoang, Pham T. Diep, James I. Campbell, Tran P.M. Sieu, Stephen G. Baker, Nguyen V.V Chau, Tran T. Hien, David G. Lalloo, Jeremy J. Farrar.

### **Table of Contents**

|                                                                              |          |
|------------------------------------------------------------------------------|----------|
| <b>METHODS</b>                                                               | <b>2</b> |
| <b>CEREBROSPINAL FLUID EXAMINATION AND PROCESSING</b>                        | <b>2</b> |
| <b>CRYPTOCOCCUS IDENTIFICATION</b>                                           | <b>2</b> |
| <b>RANDOMISATION</b>                                                         | <b>3</b> |
| <b>ADVERSE EVENT RECORDING</b>                                               | <b>3</b> |
| <b>RESULTS</b>                                                               | <b>4</b> |
| <b>TABLE S1. BASELINE CHARACTERISTICS OF THE STUDY PARTICIPANTS.</b>         | <b>4</b> |
| <b>TABLE S2. SUMMARY OF PRIMARY AND KEY SECONDARY OUTCOMES OF THE STUDY.</b> | <b>6</b> |
| <b>TABLE S3. SUMMARY OF ADVERSE EVENTS.</b>                                  | <b>8</b> |
| <b>REFERENCES</b>                                                            | <b>9</b> |

## Methods

### Cerebrospinal fluid examination and processing

CSF was examined from all patients at admission using standard methods including Gram's, Ziehl-Neelsen and India ink stains, and culture on blood, Sabouraud's and Lowenstein-Jensen media. Cerebrospinal fluid yeast quantitative counts were determined on all samples. Briefly, 100 uL aliquots of whole CSF were serially diluted in 0.9ml of sterile water under aseptic conditions to produce five 10 fold dilutions (maximum dilution  $10^{-5}$ ). 100uL of each dilution was spotted 20-25 times on each half of a Sabouraud-Dextrose agar plate. Whole CSF and each dilution were agitated with vortexing prior to aliquoting and spotting plates. Samples were processed within 4 hours of lumbar puncture. Plates were examined daily for one week and the number of colonies recorded. The quantitative count was calculated using the plate for each sample where the total number of colonies was between 30 and 130 colonies [1]. *Cryptococcus* antigen testing was performed using the Murex Cryptococcus Test (Remel, Lenexa, USA). HIV infection was confirmed or excluded through antibody and antigen testing (Determine HIV1/2, HIV AXSYM HIV1/2 gO, Abbott, Maidenhead, UK). CD4 lymphocyte counts were performed by flow cytometry (FACSCalibur, Becton Dickinson USA) as soon as possible after randomization.

### Cryptococcus identification

All strains were confirmed as *Cryptococcus* species using classical mycological methods (see on-line appendix), including colony morphology, microscopy, growth on bird seed

agar, urease production, sugar assimilation tests (API 32C, BioMerieux SA, Marcy l'Etoile, France), biotyping with canavanine-glycine bromothymol blue agar and speciation to the varietal level using *URA5* PCR-RFLP [2].

### **Drug Administration and monitoring**

Patients received 1 liter normal saline infusions prior to amphotericin B administration [3]. Amphotericin B was infused over 4 hours. Flucytosine and fluconazole were administered orally or by nasogastric tube. Patients had weekly blood counts and blood chemistry for the first 4 weeks, at day 70 and 6 months. Plasma flucytosine levels were not monitored.

### **Randomisation**

A computer-generated sequence of random numbers was used to assign treatment in blocks of 9 patients. The random allocations were placed in sealed opaque envelopes, which were opened by the study physician once each patient was enrolled into the trial after meeting the inclusion and exclusion criteria. Patients were enrolled in the order they presented and the sealed envelopes were opened in strict numerical sequence.

### **Adverse event recording**

Adverse events were recorded during the 10 week treatment period. If a sign or symptom was present prior to the start of therapy, it was only recorded as an adverse event if there was a change in grade after treatment initiation and during the ten week study period.

Grading of adverse events was according to the National Cancer Institute Common Terminology Criteria ([www.ctep.cancer.gov/](http://www.ctep.cancer.gov/)).

## Results

**Table S1. Baseline characteristics of the study participants.**

| Characteristics           | n     | Amphotericin<br>monotherapy<br>(N=99, Arm I) | Amphotericin plus<br>flucytosine<br>(N=100, Arm II) | Amphotericin plus<br>fluconazole<br>(N=99, Arm III) |
|---------------------------|-------|----------------------------------------------|-----------------------------------------------------|-----------------------------------------------------|
| Age in years              | 297   | 28 (25, 31)                                  | 28 (25, 33)                                         | 27 (24, 31)                                         |
| Male sex                  | 298   | 81 (82%)                                     | 80 (80%)                                            | 84 (85%)                                            |
| Intravenous drug use      | 281   | 51 (57%)                                     | 49 (52%)                                            | 53 (55%)                                            |
| Duration of symptoms days | 270   | 15 (7, 22)                                   | 14 (8, 18)                                          | 12 (7, 20)                                          |
| New HIV diagnosis         | 282   | 49 (52%)                                     | 50 (54%)                                            | 39 (41%)                                            |
| On ARV therapy            | 298   | 2 (2%)                                       | 5 (5%)                                              | 3 (3%)                                              |
| Weight kg                 | 292   | 46 (42, 50)                                  | 47 (40,50)                                          | 48 (44, 50)                                         |
| Headache                  | 295   | 95 (98%)                                     | 99 (100%)                                           | 98 (99%)                                            |
| Fever                     | 293   | 75 (77%)                                     | 75 (77%)                                            | 72 (73%)                                            |
| Neck Stiffness            | 277   | 66 (73%)                                     | 64 (70%)                                            | 66 (69%)                                            |
| Fits                      | 290   | 9 (10%)                                      | 9 (9%)                                              | 2 (2%)                                              |
| Glasgow Coma Score        | 294   |                                              |                                                     |                                                     |
|                           | 15    | 66 (68%)                                     | 67 (68%)                                            | 78 (80%)                                            |
|                           | 11-14 | 21 (22%)                                     | 24 (24%)                                            | 15 (15%)                                            |
|                           | ≤10   | 10 (10%)                                     | 8 (8%)                                              | 5 (5%)                                              |
| Cranial Nerve Palsy       | 293   | 27 (28%)                                     | 22 (22%)                                            | 18 (18%)                                            |
| Papilloedema              | 267   | 18 (21%)                                     | 19 (21%)                                            | 17 (18%)                                            |
| Blind                     | 250   | 0 (0%)                                       | 2 (2%)                                              | 0 (0%)                                              |
| Blurred vision            | 250   | 20 (26%)                                     | 19 (22%)                                            | 16 (19%)                                            |
| Hemiplegia                | 294   | 1 (1%)                                       | 7 (7%)                                              | 4 (4%)                                              |

|                                             |     |                   |                   |                   |
|---------------------------------------------|-----|-------------------|-------------------|-------------------|
| <b>Oral Thrush</b>                          | 293 | 60 (62%)          | 61 (63%)          | 60 (61%)          |
| <b>Investigations</b>                       |     |                   |                   |                   |
| <b>CSF Opening Pressure &gt; 18cmCSF</b>    | 244 | 56 (67%)          | 61 (76%)          | 55 (68%)          |
| <b>CSF White Cell Count cells/ml</b>        | 264 | 33 (7, 76)        | 26(8, 61)         | 24 (7, 83)        |
| <b>CSF Glucose mmol/L</b>                   | 282 | 2.21 (1.50, 3.00) | 2.30 (1.70, 2.98) | 2.34 (1.70, 2.99) |
| <b>Plasma Glucose mmol/L</b>                | 276 | 5.69(4.84,6.50)   | 5.90(4.88,6.90)   | 5.43(4.80,6.20)   |
| <b>Log10 CSF Yeast Count CFUs/ml</b>        | 236 | 5.91 (5.49, 6.48) | 5.81 (4.74, 6.15) | 5.74 (4.80, 6.34) |
| <b>CSF Cryptococcal Antigen Titre</b>       | 223 | 2048 (512, 8192)  | 2048 (256, 4096)  | 1024 (256, 2048)  |
| <b>Hepatitis B surface antigen positive</b> | 203 | 8 (12%)           | 4 (6%)            | 10 (15%)          |
| <b>CD4 count/UI</b>                         | 218 | 18 (8.00, 37)     | 17 (9, 28)        | 14 (8, 41)        |

---

n refers to the number of patients with non-missing characteristic. Summary statistics are numbers (%) of patients with non-missing characteristic for categorical variables and median (interquartile range) for continuous variables.

**Table S2. Summary of primary and key secondary outcomes of the study.**

| <b>Outcome</b>                   | <b>Amphotericin<br/>monotherapy<br/>(N=99, Arm I)</b> | <b>Amphotericin<br/>plus flucytosine<br/>(N=100, Arm II)</b> | <b>Amphotericin<br/>plus<br/>fluconazole<br/>(N=99, Arm<br/>III)</b> | <b>Pairwise comparisons<br/>Estimate (95% CI); p-value</b> |
|----------------------------------|-------------------------------------------------------|--------------------------------------------------------------|----------------------------------------------------------------------|------------------------------------------------------------|
| <b>Deaths until day 14</b>       |                                                       |                                                              |                                                                      | Hazard ratios:                                             |
| <b>[co-primary outcome]</b>      |                                                       |                                                              |                                                                      | II vs. I: 0.57 (0.30, 1.08); p=0.08 #                      |
| - no deaths                      | 25                                                    | 15                                                           | 20                                                                   | III vs. I: 0.78 (0.44,1.41); p=0.42 #                      |
| - survival estimate (95% CI)     | 0.75 (0.67,0.84)                                      | 0.85 (0.78,0.92)                                             | 0.80 (0.73,0.88)                                                     | III vs. II: 1.38 (0.71,2.70); p=0.34                       |
| <b>Deaths until day 70</b>       |                                                       |                                                              |                                                                      | Hazard ratios: \$                                          |
| <b>[co-primary outcome]</b>      |                                                       |                                                              |                                                                      | II vs. I: 0.61 (0.39,0.97); p=0.04 #                       |
| - no deaths                      | 44                                                    | 30                                                           | 33                                                                   | III vs. I: 0.71 (0.45,1.11); p=0.13 #                      |
| - survival estimate (95% CI)     | 0.56 (0.47,0.66)                                      | 0.69 (0.61,0.79)                                             | 0.67 (0.58,0.77)                                                     | III vs. II: 1.15 (0.70,1.89); p=0.57                       |
| <b>Deaths until day 70</b>       |                                                       |                                                              |                                                                      | Hazard ratios:                                             |
| <b>[per protocol population]</b> |                                                       |                                                              |                                                                      | II vs. I: 0.60 (0.36,0.99); p=0.04                         |
| - no deaths                      | 37/87                                                 | 26/92                                                        | 27/88                                                                | III vs. I: 0.68 (0.41,1.11); p=0.12                        |
| - survival estimate (95% CI)     | 0.58 (0.48,0.69)                                      | 0.71 (0.63,0.81)                                             | 0.69 (0.60,0.80)                                                     | III vs. II: 1.13 (0.66,1.94); p=0.65                       |
| <b>Deaths until day 182</b>      |                                                       |                                                              |                                                                      | Hazard ratios: £                                           |
| - no deaths                      | 53                                                    | 34                                                           | 45                                                                   | II vs. I: 0.56 (0.36,0.86); p=0.01                         |
| - survival estimate (95% CI)     | 0.46 (0.37,0.57)                                      | 0.65 (0.56,0.75)                                             | 0.54 (0.45,0.65)                                                     | III vs. I: 0.78 (0.53,1.16); p=0.23                        |
|                                  |                                                       |                                                              |                                                                      | III vs. II: 1.39 (0.89,2.18); p=0.14                       |
| <b>Disability on day 70</b>      |                                                       |                                                              |                                                                      |                                                            |
| - Good                           | 14 (14%)                                              | 21 (21%)                                                     | 19 (19%)                                                             | Odds ratios of status "good": §                            |
| - Intermediate                   | 20 (20%)                                              | 25 (25%)                                                     | 17 (17%)                                                             | II vs. I: 1.97 (0.92,4.21); p=0.08                         |
| - Severe disability              | 13 (13%)                                              | 7 (7%)                                                       | 12 (12%)                                                             | III vs. I: 1.73 (0.81,3.69); p=0.15                        |
| - Death                          | 44 (44%)                                              | 30 (30%)                                                     | 33 (33%)                                                             | III vs. II: 0.88 (0.43,1.79); p=0.72                       |
| - Patient not assessed           | 8 ( 8%)                                               | 17 (17%)                                                     | 18 (18%)                                                             |                                                            |
| <b>Disability on day 182</b>     |                                                       |                                                              |                                                                      |                                                            |
| - Good                           | 17 (17%)                                              | 28 (28%)                                                     | 17 (17%)                                                             | Odds ratios of status "good": §                            |

|                                                   |                     |                     |                     |                                          |
|---------------------------------------------------|---------------------|---------------------|---------------------|------------------------------------------|
| - Intermediate                                    | 11 (11%)            | 7 (7%)              | 11 (11%)            | II vs. I: 2.01 (1.04,3.88); p=0.04       |
| - Severe disability                               | 2 (2%)              | 8 (8%)              | 3 (3%)              | III vs. I: 1.02 (0.50,2.05); p=0.96      |
| - Death                                           | 53 (54%)            | 34 (34%)            | 45 (45%)            | III vs. II:0.51 (0.26,0.997); p=0.049    |
| - Patient not assessed                            | 16 (16%)            | 23 (23%)            | 23 (23%)            |                                          |
| <b>CSF fungal decline in first 14 days</b>        |                     |                     |                     | Difference in estimated change:          |
| - estimated change (95% CI)                       | -0.31 (-0.34,-0.29) | -0.42 (-0.44,-0.40) | -0.32 (-0.34,-0.29) | II vs. I: -0.10 (-0.14,-0.07); p<0.0001  |
| <b>[log<sub>10</sub> CFU/mL of CSF per day]</b>   |                     |                     |                     | III vs. I: 0.00 (-0.04, 0.03); p=0.83    |
|                                                   |                     |                     |                     | III vs. II: 0.10 ( 0.07, 0.14); p<0.0001 |
| <b>CSF fungal clearance</b>                       |                     |                     |                     | Hazard ratios:                           |
| - no of patients with documented fungal clearance | 52                  | 74                  | 63                  | II vs. I: 3.18 (2.17,4.66); p<0.0001     |
| - clearance rate (95% CI)                         | 0.17 (0.13,0.23)    | 0.39 (0.31,0.50)    | 0.26 (0.20,0.34)    | III vs. I: 1.39 (0.94,2.07); p=0.10      |
| <b>[per person-weeks of follow up]</b>            |                     |                     |                     | III vs. II:0.44 (0.30,0.63); p<0.0001    |

All reported results are on the intention to treat population, and not adjusted for baseline covariates or multiple comparisons unless mentioned otherwise (except for time to CSF fungal clearance which is adjusted for baseline fungal count).

# Primary comparisons. Conservative Bonferroni multiplicity adjustment would require doubling the p-values (adjustment for multiple primary endpoints) or a four-fold increase (adjustment for multiple primary endpoints and for multiple comparisons of the combination therapies versus a common control group).

\$ Hazard ratios adjusted for baseline covariates (as defined in the methods section): II vs I: 0.62 (0.38,0.996); p=0.048; III vs. I: 0.94 (0.58,1.51); p=0.80; III vs. II: 1.52 (0.91,2.55); p=0.11.

£ Hazard ratios adjusted for baseline covariates: II vs. I: 0.56 (0.36,0.87); p=0.01; III vs. I: 1.01 (0.66,1.53); p=0.97; III vs. II: 1.81 (1.14, 2.88); p=0.01.

§ Based on multiple imputation of missing outcomes for patients not assessed for disability. Multiple imputation estimated the proportion of patients with good disability status in the groups I-III as 16%, 27%, and 25%, respectively, on day 70 and 25%, 40%, and 25% on day 182.



**Table S3. Summary of adverse events.**

| Type of adverse event                    | Amphotericin<br>monotherapy<br>(N=99, group I) | Amphotericin<br>plus flucytosine<br>(N=100, group<br>II) | Amphotericin<br>plus fluconazole<br>(N=99, group<br>III) | Overall<br>comparison<br>(p-value) |
|------------------------------------------|------------------------------------------------|----------------------------------------------------------|----------------------------------------------------------|------------------------------------|
| <b>Any event</b>                         |                                                |                                                          |                                                          |                                    |
| - No of patients with at least one event | 82 (83%)<br>338                                | 85 (85%)<br>376                                          | 85 (86%)<br>362                                          | 0.85                               |
| - No of events                           |                                                |                                                          |                                                          |                                    |
| <b>Hypokalaemia</b>                      |                                                |                                                          |                                                          |                                    |
| - All                                    | 54 (55%)                                       | 56 (56%)                                                 | 54 (55%)                                                 | 0.98                               |
| - Grade 3 and 4                          | 20 (20%)                                       | 22 (22%)                                                 | 13 (13%)                                                 | 0.24                               |
| <b>Anaemia</b>                           |                                                |                                                          |                                                          |                                    |
| - All                                    | 62 (63%)                                       | 63 (63%)                                                 | 57 (58%)                                                 | 0.71                               |
| - Grade 3 and 4                          | 46 (46%)                                       | 35 (35%)                                                 | 29 (29%)                                                 | 0.04                               |
| <b>Neutropenia</b>                       |                                                |                                                          |                                                          |                                    |
| - All                                    | 19 (19%)                                       | 34 (34%)                                                 | 32 (32%)                                                 | 0.04                               |
| - Grade 3 and 4                          | 2 (2%)                                         | 9 (9%)                                                   | 9 (9%)                                                   | 0.07                               |
| <b>Thrombocytopenia</b>                  |                                                |                                                          |                                                          |                                    |
| - All                                    | 8 (8%)                                         | 15 (15%)                                                 | 11 (11%)                                                 | 0.32                               |
| - Grade 3 and 4                          | 2 (2%)                                         | 4 (4%)                                                   | 3 (3%)                                                   | 0.91                               |
| <b>Rigor</b>                             |                                                |                                                          |                                                          |                                    |
|                                          | 13 (13%)                                       | 7 (7%)                                                   | 6 (6%)                                                   | 0.18                               |
| <b>Opportunistic infection*</b>          |                                                |                                                          |                                                          |                                    |
| PCP                                      | 20 (20.2%)                                     | 22 (22%)                                                 | 20(20.2%)                                                | 0.95                               |
| <b>Pulmonary and extra-pulmonary</b>     |                                                |                                                          |                                                          |                                    |
| TB                                       | 9 (9.09%)                                      | 12 (12%)                                                 | 6 (6.06%)                                                | 0.36                               |
| Non-typhoidal salmonellosis              | 2 (2.02%)                                      | 1 (1%)                                                   | 1 (1.01%)                                                | 0.85                               |
| CMV retinitis                            | 1 (1.01%)                                      | 2 (2%)                                                   | 0 (0%)                                                   | 0.78                               |
| Zoster                                   | 1 (1.01%)                                      | 1 (1%)                                                   | 1 (1%)                                                   | 1.00                               |
| Cerebral lymphoma                        | 0 (0%)                                         | 1 (1%)                                                   | 0 (0%)                                                   | 1.00                               |

|                                      |                      |             |          |             |      |
|--------------------------------------|----------------------|-------------|----------|-------------|------|
|                                      | <b>Penicilliosis</b> | 0 (0%)      | 0 (0%)   | 1 (1%)      | 0.66 |
| <b>Rash</b>                          |                      | 5 (5%)      | 7 (7%)   | 5 (5%)      | 0.86 |
| <b>New neurological sign/symptom</b> |                      | 11 (11%)    | 12 (12%) | 10 (10%)    | 0.97 |
| <b>Fit</b>                           |                      | 2 (2%)      | 0 (0%)   | 2 (2%)      | 0.4  |
| <b>Transaminitis</b>                 |                      |             |          |             |      |
|                                      | <b>All</b>           | 38 (38%)    | 44 (44%) | 42 (42%)    | 0.72 |
|                                      | <b>Grade 3 and 4</b> | 11 (11%)    | 6 (6%)   | 14 (14%)    | 0.14 |
| <b>Hyponatraemia</b>                 |                      |             |          |             |      |
|                                      | <b>All</b>           | 28 (28%)    | 33 (33%) | 33 (33%)    | 0.71 |
|                                      | <b>Grade 3 and 4</b> | 3 (3%)      | 8 (8%)   | 9 (9%)      | 0.19 |
| <b>Hyper creatinemia</b>             |                      |             |          |             |      |
|                                      | <b>All</b>           | 34 (34%)    | 41 (41%) | 46 (46%)    | 0.22 |
|                                      | <b>Grade 3 and 4</b> | 2 (2%)      | 2 (2%)   | 2 (2%)      | 1.00 |
| <b>Other<sup>S</sup></b>             |                      | 28 (28.28%) | 23 (23%) | 31 (31.31%) | 0.41 |

Data are numbers (%) of patients, unless otherwise indicated.

\*all opportunistic infections and all grade 3 and 4 events are classified as severe adverse events

<sup>S</sup>all occurred with frequency of 0.34% except nausea and vomiting (2.7%), sepsis (1.7%), thrombophlebitis, haematemesis, diarrhoea, urinary retention (each 0.7%).

## References

1. Brouwer AE, Rajanuwong A, Chierakul W, Griffin GE, Larsen RA, White NJ, Harrison TS: **Combination antifungal therapies for HIV-associated cryptococcal meningitis: a randomised trial.** *Lancet* 2004, **363**(9423):1764-1767.
2. Meyer W, Castaneda A, Jackson S, Huynh M, Castaneda E: **Molecular typing of IberoAmerican Cryptococcus neoformans isolates.** *Emerg Infect Dis* 2003, **9**(2):189-195.

3. Khoo SH, Bond J, Denning DW: **Administering amphotericin B--a practical approach.** *JAntimicrobChemother* 1994, **33**(2):203-213.
